# Supplementary material for: Exploration-Exploitation and Suicidal Behavior in Borderline Personality Disorder and Depression
Source: PubMed Central journal article supplement (PMC11238070; doi:10.1001/jamapsychiatry.2024.1796), 2024-07-10
Supplement: jamapsychiatry-e241796-s002.pdf [file jamapsychiatry-e241796-s002.pdf]

## Data Sharing Statement

Tsypes. Exploration-Exploitation and Suicidal Behavior in Borderline Personality Disorder and Depression. *JAMA Psychiatry*. Published July 10, 2024. doi:10.1001/jamapsychiatry.2024.1796

### Data

**Data available:** Yes

**Data types:** Deidentified participant data, Data dictionary

**How to access data:** [https://github.com/tsypesa/Explore\\_Exploit\\_SB](https://github.com/tsypesa/Explore_Exploit_SB)

**When available:** With publication

### Supporting Documents

**Document types:** Statistical/analytic code

**How to access documents:** [https://github.com/tsypesa/Explore\\_Exploit\\_SB](https://github.com/tsypesa/Explore_Exploit_SB)

**When available:** With publication

### Additional Information

**Who can access the data:** Anyone requesting the data.

**Types of analyses:** To evaluate key analyses in the paper.

**Mechanisms of data availability:** With investigator support.
